# Supplementary material for: Preliminary Report: Osteoarthritis and Rheumatoid Arthritis Synovial Fluid Increased Osteoclastogenesis In Vitro by Monocyte Differentiation Pathway Regulating Cytokines
Source: Mediators Inflamm. 2022 May 31;2022:2606916. doi: 10.1155/2022/2606916 (PMC9175097; doi:10.1155/2022/2606916)
Supplement: Supplementary 1 — S1 table; cytokine data from serum and synovial fluid samples. [file 2606916.f1.xlsx]

## Sheet: Taul1
Cytokine concetrations in rheumatoid arthritis and osteoarthritis patients' synovial fluids (RAn and OAn), and in serums of rheumatoid arthritis patients' and healthy control individuals' serums (RAs and CTRLs).
Jani Luukkonen (a), Johanna Huhtakangas (a,b), Sanna Palosaari (a), Juha Tuukkanen (a), Olli Vuolteenaho (c), Petri Lehenkari (a,d)
a Department of Anatomy and Cell Biology, Cancer Research and Translational Medicine Research Unit, Medical Research Center Oulu, Faculty of Medicine, University of Oulu, Aapistie 5, Oulu 90014 Finland
b Rheumatology Unit, Oulu University Hospital, Medical Research Center Oulu, Oulu, Finland
c Department of Clinical Chemistry, Cancer Research and Translational Medicine Research Unit, Faculty of Medicine, University of Oulu, Oulu, Finland.
d Department of Surgery, Medical Research Center Oulu, University of Oulu and University of Oulu Hospital.
RA and OA synovial fluid (RAn and OAn) was acquired from patients undergoing total knee replacement operations. RA serum (RAs) was collected from untreated RA patients at the time of diagnosis. All RA patients were ACPA positive. Healthy control serum (CTRLs) was collected from healthy volunteers. No additional trauma was caused during sample acquisition. The patients were informed and they gave …
The synovial fluid samples were diluted to 25% concentration and serum samples to 50% concentration for analyses. The cytokines were analyzed using the Bio-Rad Bio-Plex Pro™ Human Cytokine 27-plex assay, Luminex MagPix Instrument and Luminex xPotent Software.
		pg/ml
sample		OPG	RANKL	MIP-1b	IL-6	IFN-y	IL-1ra	IL-5	GM-CSf	TNF-a	RANTES	IL-2	IL-1b	Eotaxin	Basic FGF	VEGF	PDGF-BB	IP-10	IL-13	IL-4	MCP-1	IL-8	MIP-1a	IL-10	G-CSF	IL-15	IL-7	IL-12(p70)	IL-17	IL-9
1	RAn	252.14	<7.04↓	99.45	572.395	272.545	482.645	11.675	52.77	135.025	92.885	14.895	15.88	74.275	18.97	1016.86	24.86	6049	27.695	4.665	164.1	3709	11.945	71.615	104.78	31.55	67.465	160.675	18.915	14.53
2	RAn	100.95	<7.04↓	<5.06↓	<1.62↓	<3.56↓	<25.71↓	<1.79↓	<3.05↓	<10.80↓	<2.91↓	<0.45↓	<0.43↓	<1.24↓	<4.04↓	214.2	<2.01↓	49.58	<0.32↓	<0.30↓	134.8	47.97	<0.51↓	<4.79↓	<3.63↓	<6.38↓	<1.03↓	<1.68↓	<2.02↓	<2.01↓
3	RAn	213.995	13.93	2682.5	3479.5	121.49	5975.5	2.445	48.08	151.35	236.95	5.21	33.52	46.89	36.535	2085.5	52.11	41672	9.66	4.405	109.88	7601	327.34	48.91	108.655	47.54	10.66	157.515	163.725	67.26
4	RAn	801.715	<7.04↓	19.975	43.455	4.345	48.86	<1.79↓	7.465	<10.80↓	67.51	<0.45↓	<0.43↓	4.355	<4.04↓	94.88	<2.01↓	1305.63	4.715	<0.30↓	20.625	16.075	4.735	<4.79↓	16.305	<6.38↓	3.81	10.595	<2.02↓	2.995
5	RAn	154.43	<7.04↓	<5.06↓	348.62	<3.56↓	144.54	<1.79↓	<3.05↓	<10.80↓	<2.91↓	<0.45↓	<0.43↓	<1.24↓	<4.04↓	1568	<2.01↓	305.17	<0.32↓	<0.30↓	273	125.38	2.07	<4.79↓	<3.63↓	<6.38↓	<1.03↓	111.08	<2.02↓	<2.01↓
6	RAn	31.91	<7.04↓	<5.06↓	<1.62↓	<3.56↓	<25.71↓	<1.79↓	<3.05↓	<10.80↓	<2.91↓	<0.45↓	<0.43↓	<1.24↓	<4.04↓	<2.94↓	<2.01↓	156.26	<0.32↓	<0.30↓	81.8	<4.08↓	<0.51↓	<4.79↓	<3.63↓	<6.38↓	<1.03↓	<1.68↓	<2.02↓	<2.01↓
7	RAn	<5.69↓	<7.04↓	43.75	14.59	<3.56↓	454.3	<1.79↓	<3.05↓	31.54	180.75	5.79	0.84	2.42	29.56	147.87	<2.01↓	158.65	2.45	0.99	206.23	85.62	3.91	8.26	59.61	<6.38↓	<1.03↓	5.09	15.89	177.1
8	RAn	783.84	<7.04↓	94.03	3430	36.85	1664	<1.79↓	94.76	36.47	1610	<0.45↓	5.73	10.48	17.22	1690	37.11	22055	1.93	1.3	320.86	1436	5.66	17.21	21.98	13.23	3.63	102.03	18.69	62.67
9	RAn	99.765	<7.04↓	12.01	144.3	2.96	30.38	<1.79↓	86.59	<10.80↓	15.97	<0.45↓	<0.43↓	2.51	2.47	328.54	<2.01↓	173.78	1.02	<0.30↓	59.96	<4.08↓	0.37	<4.79↓	<3.63↓	12.24	2.7	41.24	<2.02↓	2.18
10	RAn	314.375	<7.04↓	30.77	386.38	10.97	259.91	3.58	87	15.44	10.08	<0.45↓	1.05	8.63	11.65	662.93	2.12	117.12	1.06	0.32	234.59	86.06	5.83	6.28	13.49	8.11	3.58	62.23	2.29	9.46
11	OAn	646.305	<7.04↓	<5.06↓	472.56	<3.56↓	66.11	<1.79↓	<3.05↓	<10.80↓	<2.91↓	<0.45↓	<0.43↓	<1.24↓	<4.04↓	192.7	<2.01↓	123.44	<0.32↓	<0.30↓	133.13	125.75	<0.51↓	<4.79↓	<3.63↓	<6.38↓	<1.03↓	<1.68↓	<2.02↓	<2.01↓
12	OAn	119.285	<7.04↓	<5.06↓	<1.62↓	18.18	<25.71↓	<1.79↓	<3.05↓	<10.80↓	61.95	<0.45↓	<0.43↓	13.04	<4.04↓	<2.94↓	107.3	49.32	<0.32↓	<0.30↓	<12.11↓	<4.08↓	0.86	<4.79↓	<3.63↓	<6.38↓	<1.03↓	<1.68↓	<2.02↓	<2.01↓
13	OAn	546.97	<7.04↓	53.56	260.2	12.72	41.045	<1.79↓	<3.05↓	12.975	86.635	<0.45↓	<0.43↓	10.46	10.325	597.68	3.205	468.705	6.975	0.52	71.33	52.785	9.17	<4.79↓	15.06	<6.38↓	2.48	55.04	<2.02↓	<2.01↓
14	OAn	625.4	<7.04↓	21.695	29.88	5.3	<25.71↓	<1.79↓	2.245	<10.80↓	6.24	<0.45↓	<0.43↓	3.845	8.66	270.755	<2.01↓	264.505	3.365	<0.30↓	58.905	5.26	2.395	<4.79↓	20.75	<6.38↓	4.97	32.71	<2.02↓	1.75
15	OAn	65.56	<7.04↓	<5.06↓	<1.62↓	<3.56↓	<25.71↓	<1.79↓	<3.05↓	<10.80↓	<2.91↓	<0.45↓	<0.43↓	<1.24↓	<4.04↓	<2.94↓	<2.01↓	50.35	<0.32↓	<0.30↓	<12.11↓	<4.08↓	<0.51↓	<4.79↓	<3.63↓	<6.38↓	<1.03↓	<1.68↓	<2.02↓	<2.01↓
16	OAn	181.43	<7.04↓	<5.06↓	<1.62↓	<3.56↓	<25.71↓	<1.79↓	<3.05↓	<10.80↓	55.14	<0.45↓	<0.43↓	<1.24↓	<4.04↓	<2.94↓	81.43	133.47	<0.32↓	<0.30↓	<12.11↓	<4.08↓	<0.51↓	<4.79↓	<3.63↓	<6.38↓	<1.03↓	<1.68↓	<2.02↓	<2.01↓
17	OAn	87.51	<7.04↓	5.23	<1.62↓	<3.56↓	<25.71↓	<1.79↓	<3.05↓	<10.80↓	144.26	<0.45↓	<0.43↓	20.52	<4.04↓	<2.94↓	448.65	125.15	<0.32↓	<0.30↓	<12.11↓	<4.08↓	0.9	<4.79↓	<3.63↓	<6.38↓	<1.03↓	<1.68↓	<2.02↓	8.16
18	OAn	27.72	<7.04↓	16.12	77.99	1.9	<25.71↓	<1.79↓	<3.05↓	<10.80↓	3.68	<0.45↓	<0.43↓	10.18	2.755	168.97	<2.01↓	262.465	2.23	<0.30↓	26.2	<4.08↓	1.075	<4.79↓	6.875	<6.38↓	1.23	23.595	<2.02↓	<2.01↓
19	OAn	265.41	<7.04↓	<5.06↓	<1.62↓	<3.56↓	<25.71↓	<1.79↓	57.16	<10.80↓	<2.91↓	<0.45↓	<0.43↓	<1.24↓	<4.04↓	<2.94↓	<2.01↓	199.68	<0.32↓	<0.30↓	<12.11↓	<4.08↓	<0.51↓	<4.79↓	<3.63↓	<6.38↓	<1.03↓	<1.68↓	<2.02↓	<2.01↓
20	OAn	85.66	<7.04↓	<5.06↓	<1.62↓	<3.56↓	<25.71↓	<1.79↓	<3.05↓	<10.80↓	<2.91↓	<0.45↓	<0.43↓	<1.24↓	<4.04↓	<2.94↓	<2.01↓	79.2	<0.32↓	<0.30↓	<12.11↓	<4.08↓	<0.51↓	<4.79↓	<3.63↓	<6.38↓	<1.03↓	<1.68↓	<2.02↓	<2.01↓
21	CTRLs			16.44	<1.62↓	40.99	29.96	11.25	<3.05↓	42.59	459.03	<0.45↓	2.03	66.81	<4.04↓	<2.94↓	511.23	160.2	2.4	2.34	<12.11↓	<4.08↓	2.68	<4.79↓	35.39	<6.38↓	6.75	3.26	64.63	17.39
22	CTRLs			40.57	<1.62↓	19.39	<25.71↓	2.21	<3.05↓	23.3	428.65	<0.45↓	<0.43↓	87.41	8.66	3.17	1500	159.52	1.38	2.4	<12.11↓	<4.08↓	1.56	<4.79↓	25.51	<6.38↓	5.62	<1.68↓	92.97	20.63
23	CTRLs			34.01	<1.62↓	14.91	<25.71↓	2.21	<3.05↓	16.99	300.88	<0.45↓	<0.43↓	33.06	6.58	1.51	717.28	250.52	1.23	1.99	<12.11↓	<4.08↓	1.24	<4.79↓	19.34	<6.38↓	4.76	3.28	63.49	15.55
24	CTRLs			12.49	<1.62↓	18.18	<25.71↓	<1.79↓	<3.05↓	<10.80↓	93.68	<0.45↓	<0.43↓	42.78	<4.04↓	66.44	511.06	241.47	<0.32↓	<0.30↓	<12.11↓	<4.08↓	1.3	99.59	<3.63↓	<6.38↓	<1.03↓	49.33	<2.02↓	12.56
25	CTRLs			<5.06↓	<1.62↓	17.15	<25.71↓	<1.79↓	<3.05↓	<10.80↓	52.61	<0.45↓	<0.43↓	29.42	<4.04↓	<2.94↓	51.64	142.67	<0.32↓	<0.30↓	<12.11↓	<4.08↓	<0.51↓	<4.79↓	<3.63↓	<6.38↓	<1.03↓	<1.68↓	<2.02↓	<2.01↓
26	CTRLs			11.57	<1.62↓	17.66	<25.71↓	<1.79↓	<3.05↓	<10.80↓	164.8	<0.45↓	<0.43↓	33.69	<4.04↓	<2.94↓	683.62	213.92	<0.32↓	<0.30↓	<12.11↓	<4.08↓	1.43	<4.79↓	<3.63↓	<6.38↓	<1.03↓	<1.68↓	<2.02↓	12.85
27	CTRLs			<5.06↓	<1.62↓	<3.56↓	<25.71↓	<1.79↓	<3.05↓	<10.80↓	53.12	<0.45↓	<0.43↓	51.12	<4.04↓	<2.94↓	61.04	40.57	<0.32↓	<0.30↓	<12.11↓	<4.08↓	<0.51↓	<4.79↓	<3.63↓	<6.38↓	<1.03↓	<1.68↓	<2.02↓	<2.01↓
28	CTRLs			<5.06↓	<1.62↓	<3.56↓	<25.71↓	<1.79↓	<3.05↓	<10.80↓	80.52	<0.45↓	<0.43↓	29.27	<4.04↓	28.21	444.4	126.33	<0.32↓	<0.30↓	<12.11↓	<4.08↓	<0.51↓	<4.79↓	<3.63↓	<6.38↓	<1.03↓	<1.68↓	<2.02↓	10.33
29	CTRLs			11.88	<1.62↓	32.19	48.62	<1.79↓	<3.05↓	<10.80↓	0	<0.45↓	<0.43↓	33.3	17.92	<2.94↓	225.63	131.79	<0.32↓	<0.30↓	38.49	<4.08↓	1.36	<4.79↓	<3.63↓	<6.38↓	<1.03↓	<1.68↓	<2.02↓	<2.01↓
30	RAs			30.74	6.93	25.63	40.11	2.68	<3.05↓	21.44	1010.96	<0.45↓	1.28	41.89	<4.04↓	1.51	572.68	362.77	5.06	1.8	<12.11↓	<4.08↓	3.65	6.83	60.13	<6.38↓	12.07	14.43	58.94	18.71
31	RAs			28.81	8.86	26.42	41.04	3.4	<3.05↓	56.69	1034.58	<0.45↓	0.56	73.59	5.87	13.99	1283	287.82	2.95	2.47	<12.11↓	<4.08↓	1.4	<4.79↓	29.14	<6.38↓	5.41	9.91	114.52	34.53
32	RAs			29.53	4.89	15.63	28.76	<1.79↓	<3.05↓	22.76	917.44	<0.45↓	<0.43↓	49.68	9	47.46	1291.5	511.05	2.19	2.06	6.43	<4.08↓	0.73	7.32	29.66	<6.38↓	7.2	20.44	118.83	121.84
33	RAs			<5.06↓	<1.62↓	42.73	<25.71↓	<1.79↓	<3.05↓	<10.80↓	73.53	<0.45↓	<0.43↓	48.85	<4.04↓	<2.94↓	172.84	131.47	<0.32↓	<0.30↓	<12.11↓	<4.08↓	0.86	<4.79↓	<3.63↓	<6.38↓	<1.03↓	<1.68↓	<2.02↓	71.32
34	RAs			6.58	<1.62↓	24	109.15	<1.79↓	<3.05↓	<10.80↓	100.56	<0.45↓	5.85	37.29	<4.04↓	34.56	504.27	2831	<0.32↓	<0.30↓	108.04	<4.08↓	2.02	<4.79↓	<3.63↓	<6.38↓	<1.03↓	<1.68↓	<2.02↓	19.69
35	RAs			<5.06↓	<1.62↓	22.93	<25.71↓	<1.79↓	<3.05↓	<10.80↓	160.34	<0.45↓	<0.43↓	57.25	<4.04↓	<2.94↓	256.88	197.62	<0.32↓	<0.30↓	<12.11↓	<4.08↓	<0.51↓	120.69	<3.63↓	<6.38↓	37.71	40.46	<2.02↓	12.68
